# Supplementary material for: Determinants of Modern Contraceptive Methods (MCM) discontinuation among childbearing age women in Kinshasa, Democratic Republic of Congo.
Source: Research Square preprint supplement (doi:10.21203/rs.3.rs-215312/v1), 2021-02-26
Supplement: Supplementary file 2 [file 5f1cab4742730d0d6f31f5fd.docx]

**Formulaire de consentement éclairé**

**Intitulé de l’étude : *FACTEURS ASSOCIES A L’ABANDON DES METHODES CONTRACEPTIVES MODERNES A KINSHASA***

**Investigateur principale : Pemba Kalonji Nathalie**

Bonjour,

Mon nom est …………………………………. , je travaille pour le compte de l’Ecole de Santé Publique. Nous menons une étude ayant trait à l’abandon des méthodes contraceptives modernes chez les femmes qui utilisent la contraception à Kinshasa.

Votre participation est entièrement volontaire et vous êtes libre de ne pas répondre à des questions qui vous indisposent. Si vous acceptez de participer à l’étude, nous allons vous poser quelques questions et certaines d’entre elles sont très intimes voire même difficiles à répondre ; mais nous vous rassurons que toutes les informations que vous nous donnerez resteront confidentielles. Votre identité n’apparaîtra jamais dans les résultats qui seront publiés et il n’y aura aucun lien entre les informations données et votre nom.

Ainsi nous accordons beaucoup d’intérêt sur les informations que vous allez nous donner.

Vous pouvez décider aussi à n’importe quel moment arrêter votre participation, il n’y a aucune sanction en cas de refus.

A part le temps nous accordé, vous ne payerez rien pour participer à l’étude et aucune récompense ne vous sera donnée en échange.

Après que vous ayez lu ce document (ou qu’on vous l’ait lu), si vous avez des questions, je suis prêt à y répondre. Après que vous ayez obtenu toutes ces réponses, si vous acceptez de participer à l’enquête, je vous prie de certifier cet accord en signant ce formulaire à la date d’aujourd’hui.

**Que faire si vous avez des questions sur cette étude ?** Si vous avez des questions sur cette étude, vous pouvez appeler le chercheur principal, Madame Pemba, au +243820001401

Cette étude a été approuvée par le comité d’éthique de l’Ecole de Santé Publique de Kinshasa. Si vous avez des questions au sujet de vos droits en tant que participant, vous pouvez contacter le Président de ce comité, au +243 818 111 182.

**Enoncé du CONSENTEMENT :**

J’ai lu (ou quelqu’un d’autre a lu pour moi) ce formulaire de consentement. Je comprends dans quel but cette étude est conduite, qu’est-ce qui sera fait durant cette étude, et les risques et bénéfices tels que décrits dans ce résumé écrit. Je choisis librement de participer à cette étude.

_________________________ _______________________ ______________

Nom de la participante Sa signature Date

(En majuscule) (ou empreinte digitale)

***Cochez une cage :****Participante instruite* *Participante non instruite (le témoin*

*Signe ci-dessous)*

J’ai expliqué le but de cette étude à la participante et j’ai répondu à toutes ses questions. Au mieux de ma connaissance, elle a compris le but, procédures, risques et bénéfices de cette étude et a accepté d’y participer.

__________________________ _______________________ ______________

Nom de la personne ayant obtenu Signature Date

le consentement *(En majuscule)*

J’atteste que ce formulaire a été lu à la participante _______________________ (Nom de la participante) ce (date du jour) _______________________, qu’elle a reçu toutes les réponses à ses questions et a accepté volontairement de participer à cette étude.

__________________________ _______________________ ______________

Nom du témoin (En majuscule) Signature du témoin Date
